# Supplementary material for: Implementing a tripodal relay station in a phthalocyanine–[60]fullerene conjugate
Source: Royal Society of Chemistry journal article supplement (doi:10.1039/b716322c), 2008-01-01

# Supporting Information for

## Implementing a Tripodal Relay Station in a Phthalocyanine-[60]Fullerene Conjugate

*Maurizio Quintiliani, Axel Kahnt, Purificación Vázquez, Dirk. M. Guldi, \* Tomás Torres\**

Departamento de Química Orgánica (C-I), Universidad Autónoma de Madrid, Cantoblanco, E-28049 Madrid, Spain, Department of Chemistry, Institute for Physical Chemistry, Friedrich-Alexander-Universität Erlangen-Nürnberg, 91058 Erlangen, Germany.

tomas.torres@uam.es, guldi@chemie.uni-erlangen.de

### – Contents list –

|                                                                                             |                    |
|---------------------------------------------------------------------------------------------|--------------------|
| <i>Figure S1. <sup>1</sup>H NMR spectrum for 4 in CDCl<sub>3</sub></i>                      | <i>Page S2</i>     |
| <i>Figure S2. <sup>13</sup>C NMR spectrum for 4 in CDCl<sub>3</sub></i>                     | <i>Page S3</i>     |
| <i>Figure S3. IR spectrum for 4</i>                                                         | <i>Page S4</i>     |
| <i>Figure S4. MS spectrum for 4</i>                                                         | <i>Page S5</i>     |
| <i>Figure S5. <sup>1</sup>H NMR spectrum for 2 in THF-d<sub>8</sub></i>                     | <i>Page S6</i>     |
| <i>Figure S6. IR spectrum for 2</i>                                                         | <i>Page S7</i>     |
| <i>Figure S7. MS and HR-MS spectra for 2</i>                                                | <i>Page S8-S9</i>  |
| <i>Figure S8. <sup>1</sup>H NMR spectrum for 1 in THF-d<sub>8</sub></i>                     | <i>Page S10</i>    |
| <i>Figure S9. IR spectrum for 1</i>                                                         | <i>Page S11</i>    |
| <i>Figure S10. MS and HR-MS spectra for 1</i>                                               | <i>Page S12-13</i> |
| <i>Figure S 11. Fluorescence time profile of 2 in THF</i>                                   | <i>Page S14</i>    |
| <i>Figure S 12. Differential absorption spectra of 1 in THF</i>                             | <i>Page S15</i>    |
| <i>Figure S 13. Singlet oxygen phosphorescence spectra of 1 and 2 in different solvents</i> | <i>Page S16</i>    |

**Figure S1.**  $^1\text{H-NMR}$  spectrum for **4** in  $\text{CDCl}_3$

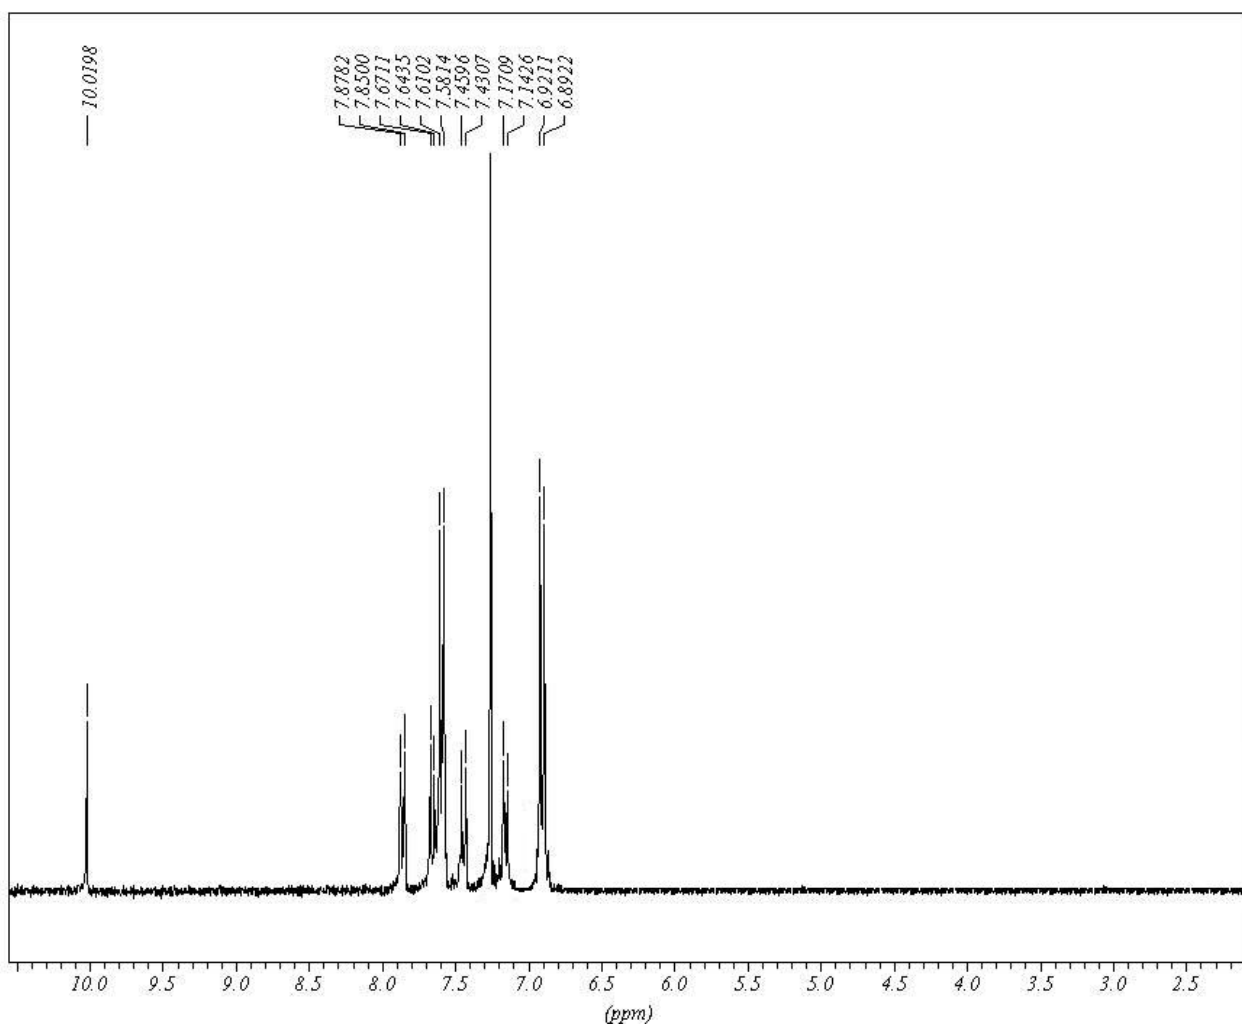

**Figure S2.**  $^{13}\text{C}$ -NMR spectrum for **4** in  $\text{CDCl}_3$

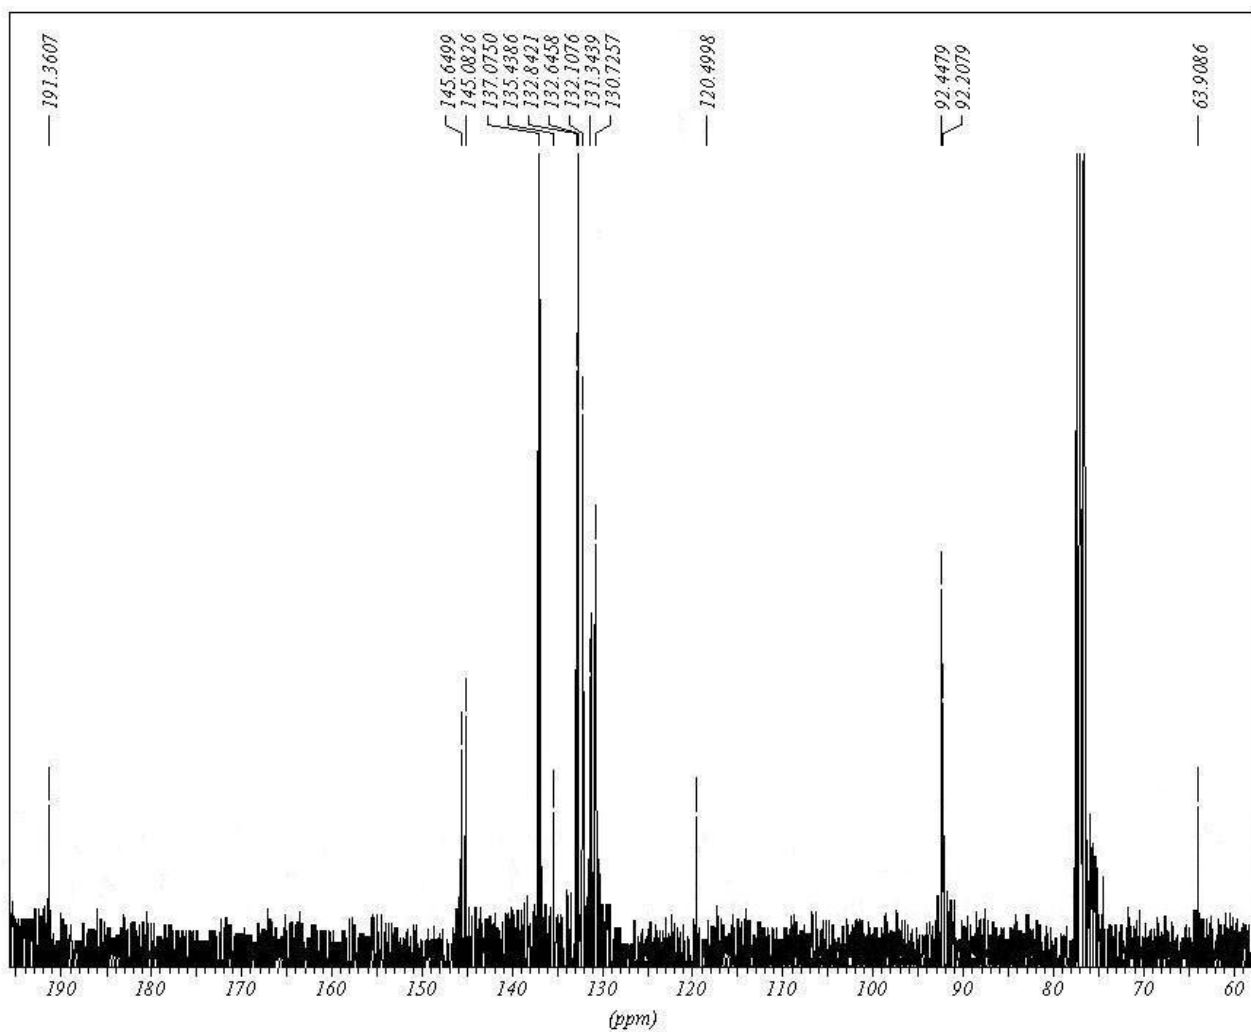

**Figure S3.** IR spectrum for **4**

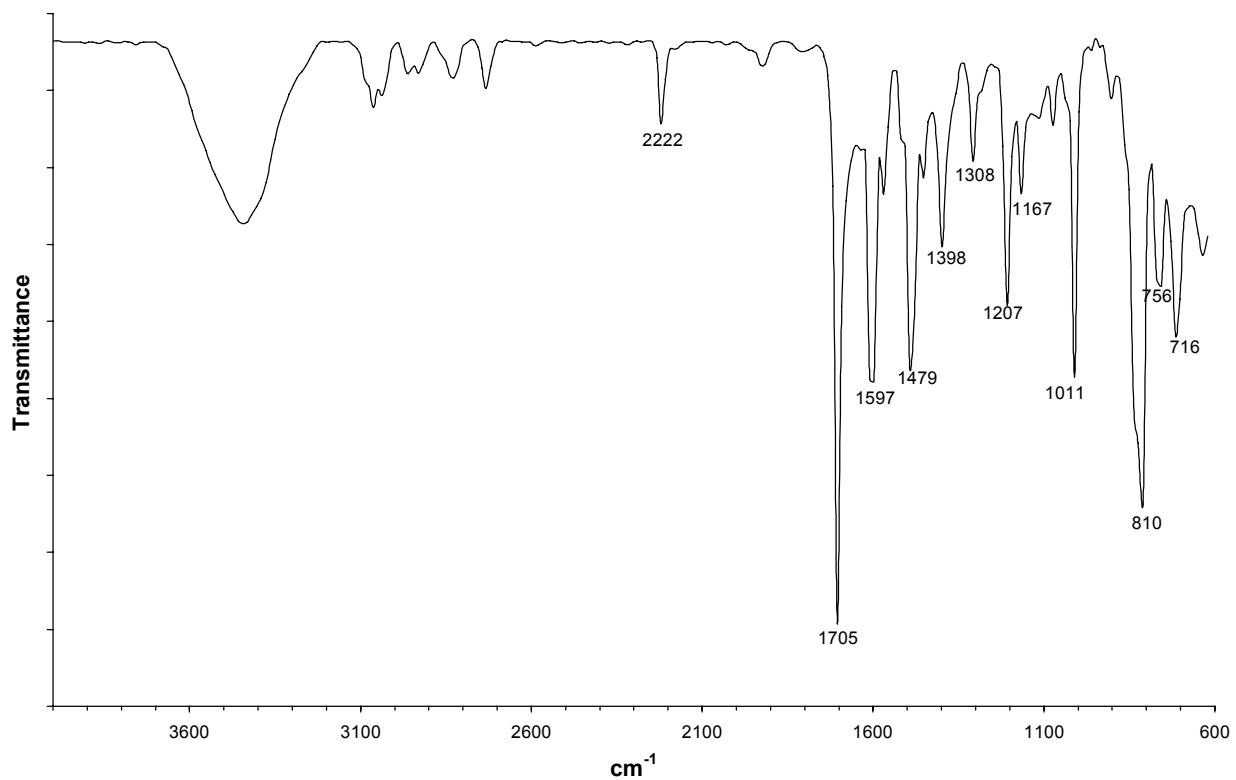

Figure S4. MS spectrum for 4

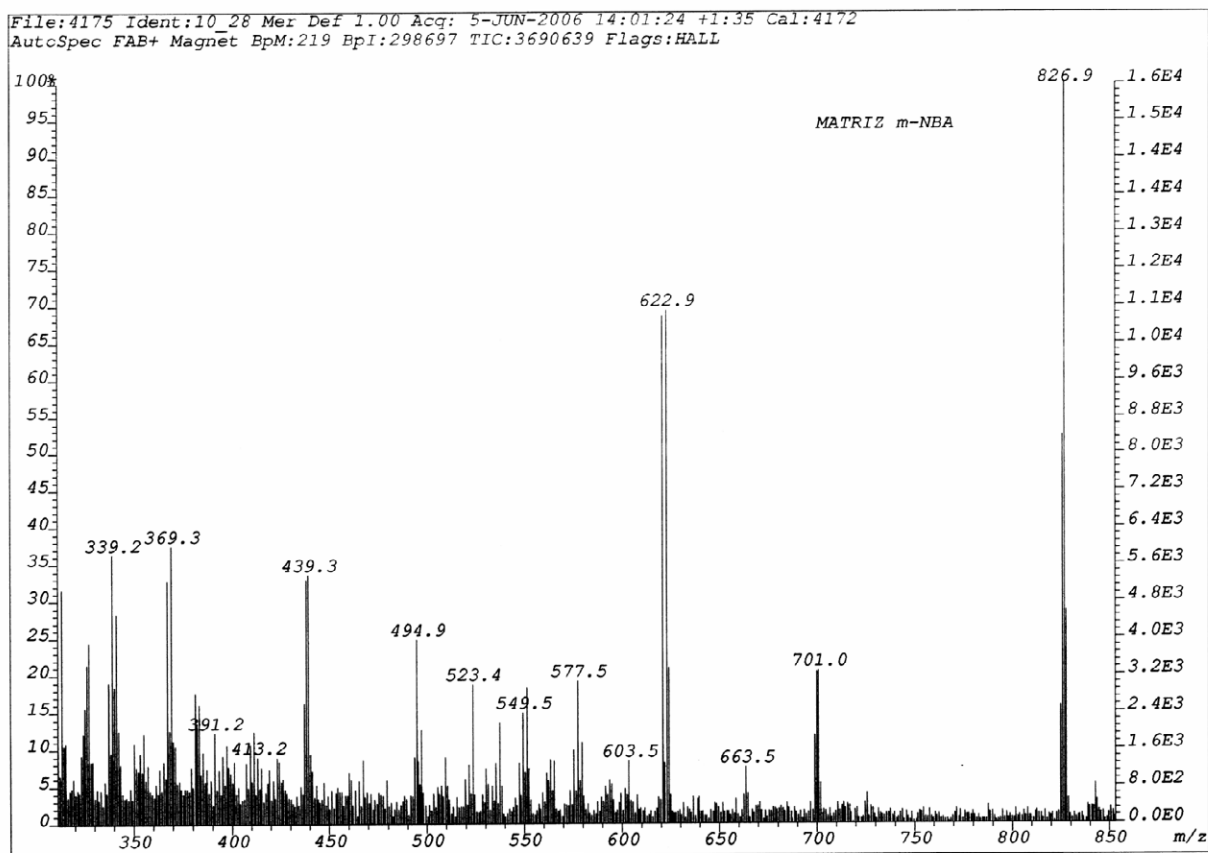

**Figure S5.**  $^1\text{H-NMR}$  spectrum for **2** in  $\text{THF-}d_8$

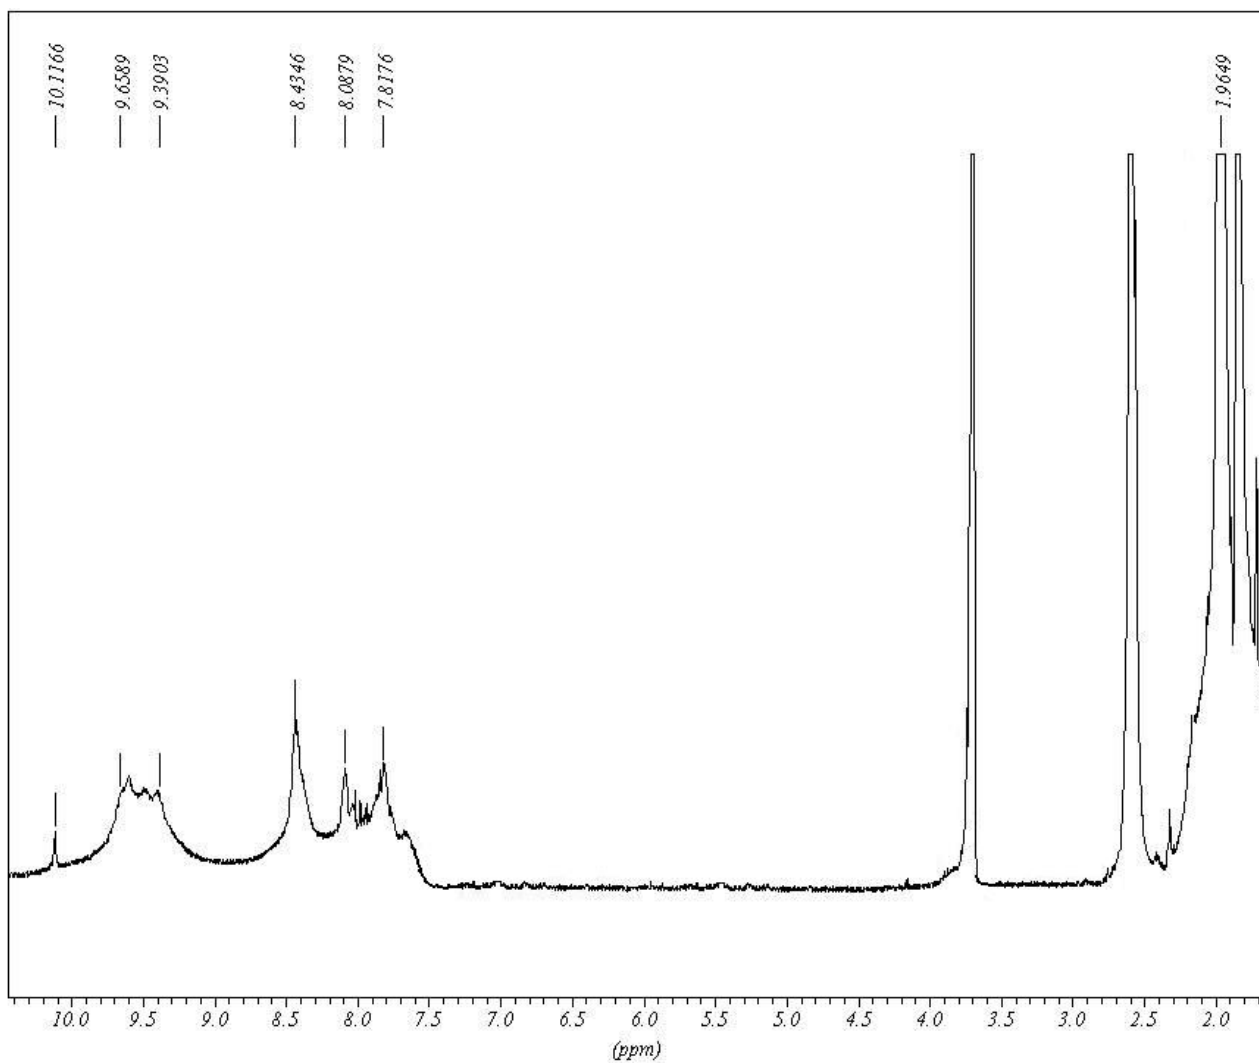

**Figure S6.** IR spectrum for **2**

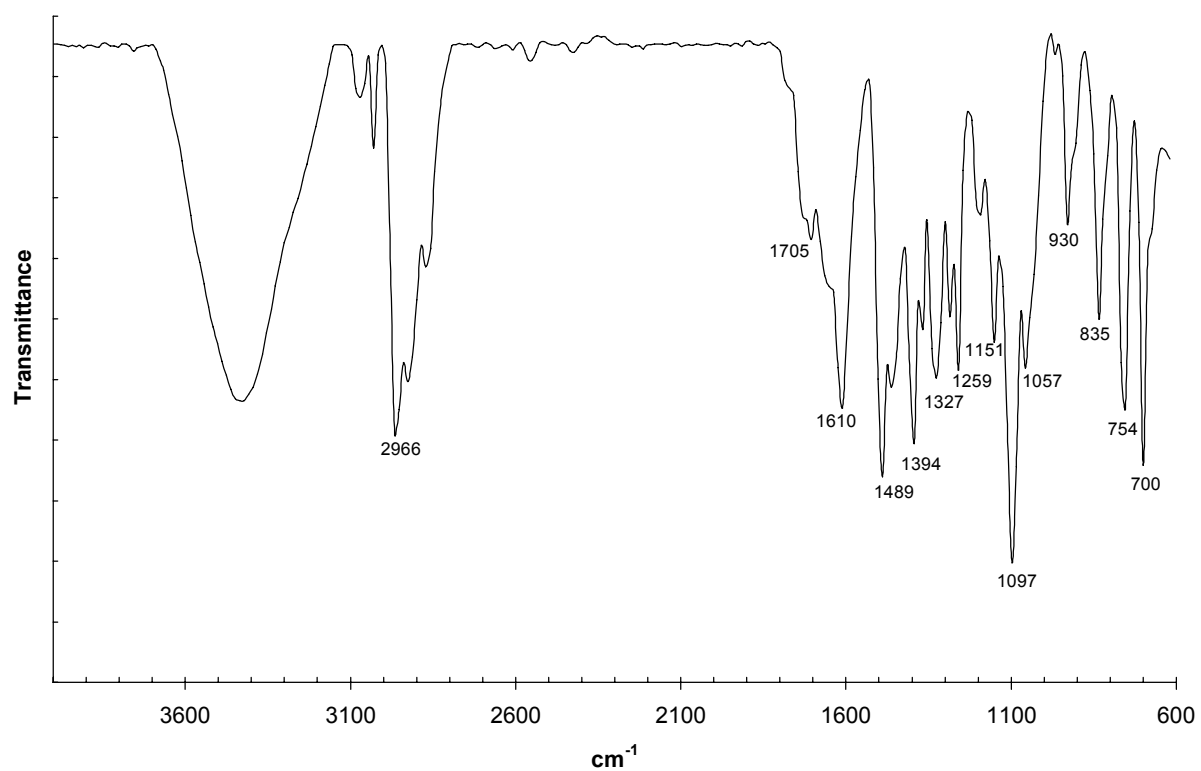

**Figure S7.** MS and HR-MS spectra for **2**

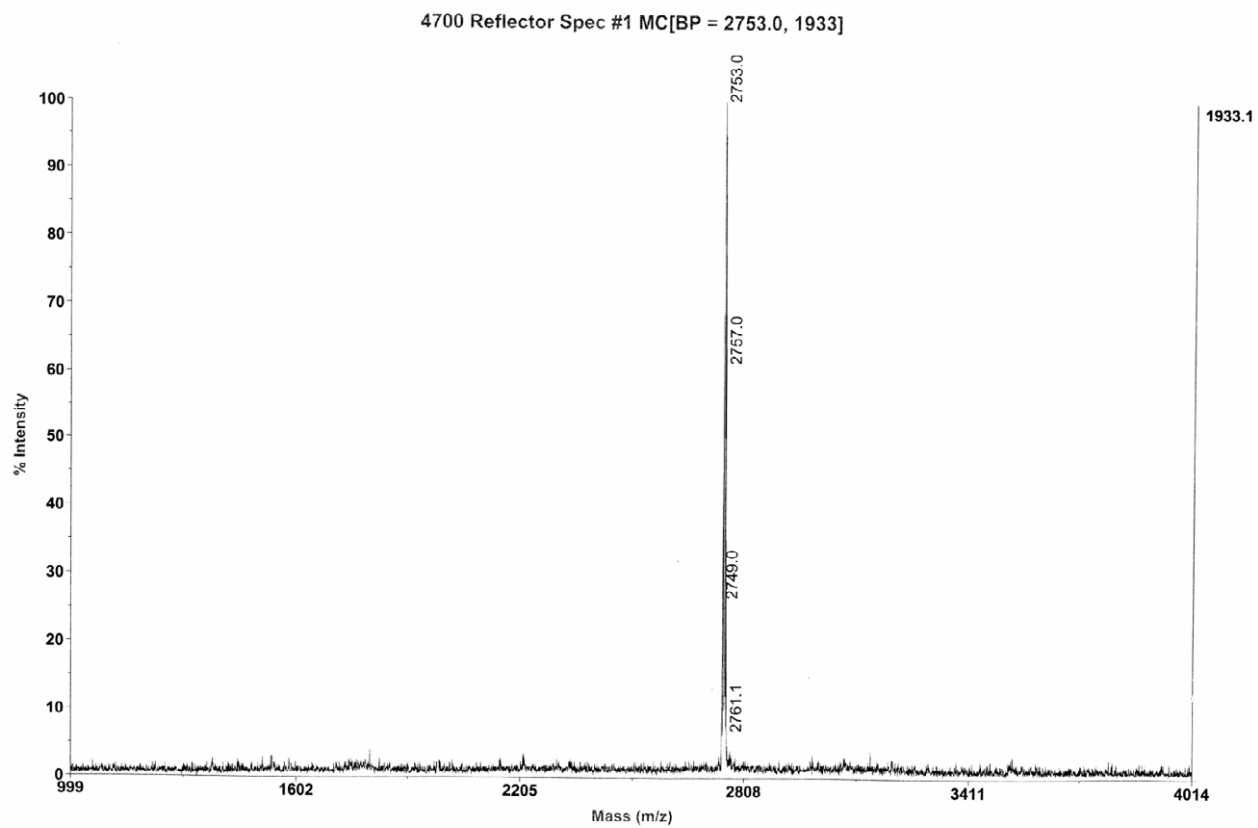



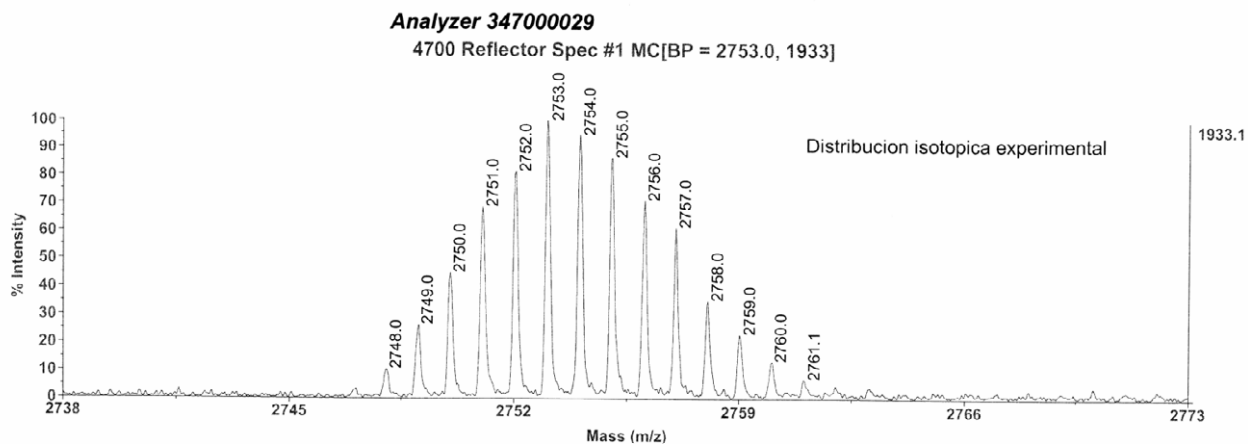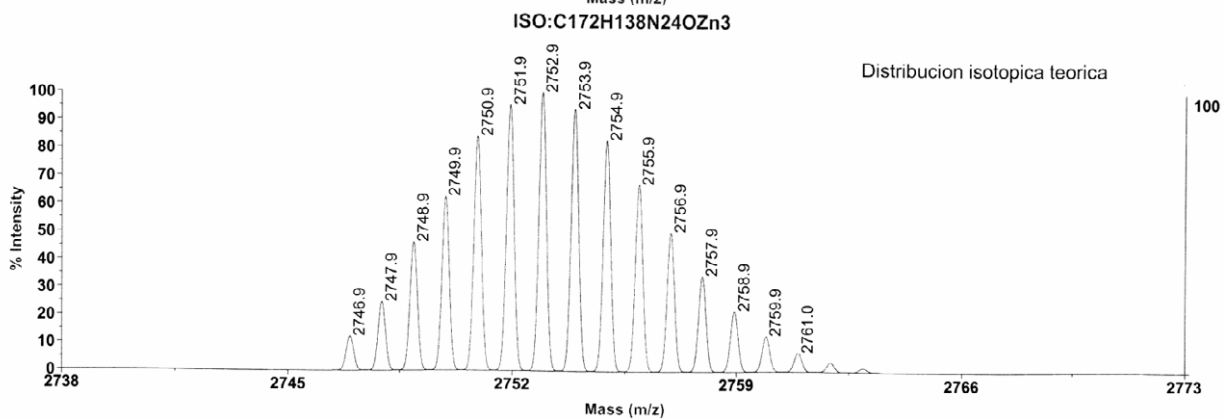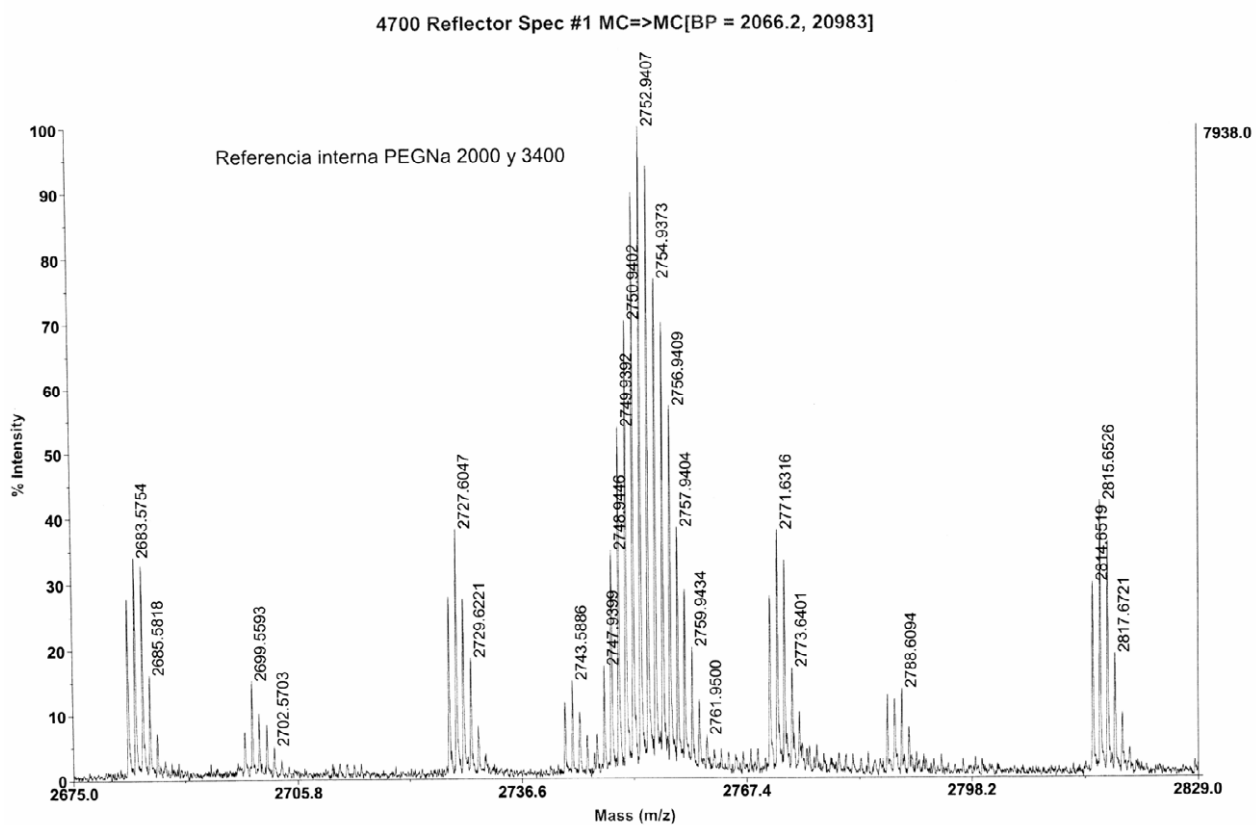

**Figure S8.**  $^1\text{H-NMR}$  spectrum for **1** in  $\text{THF-}d_8$

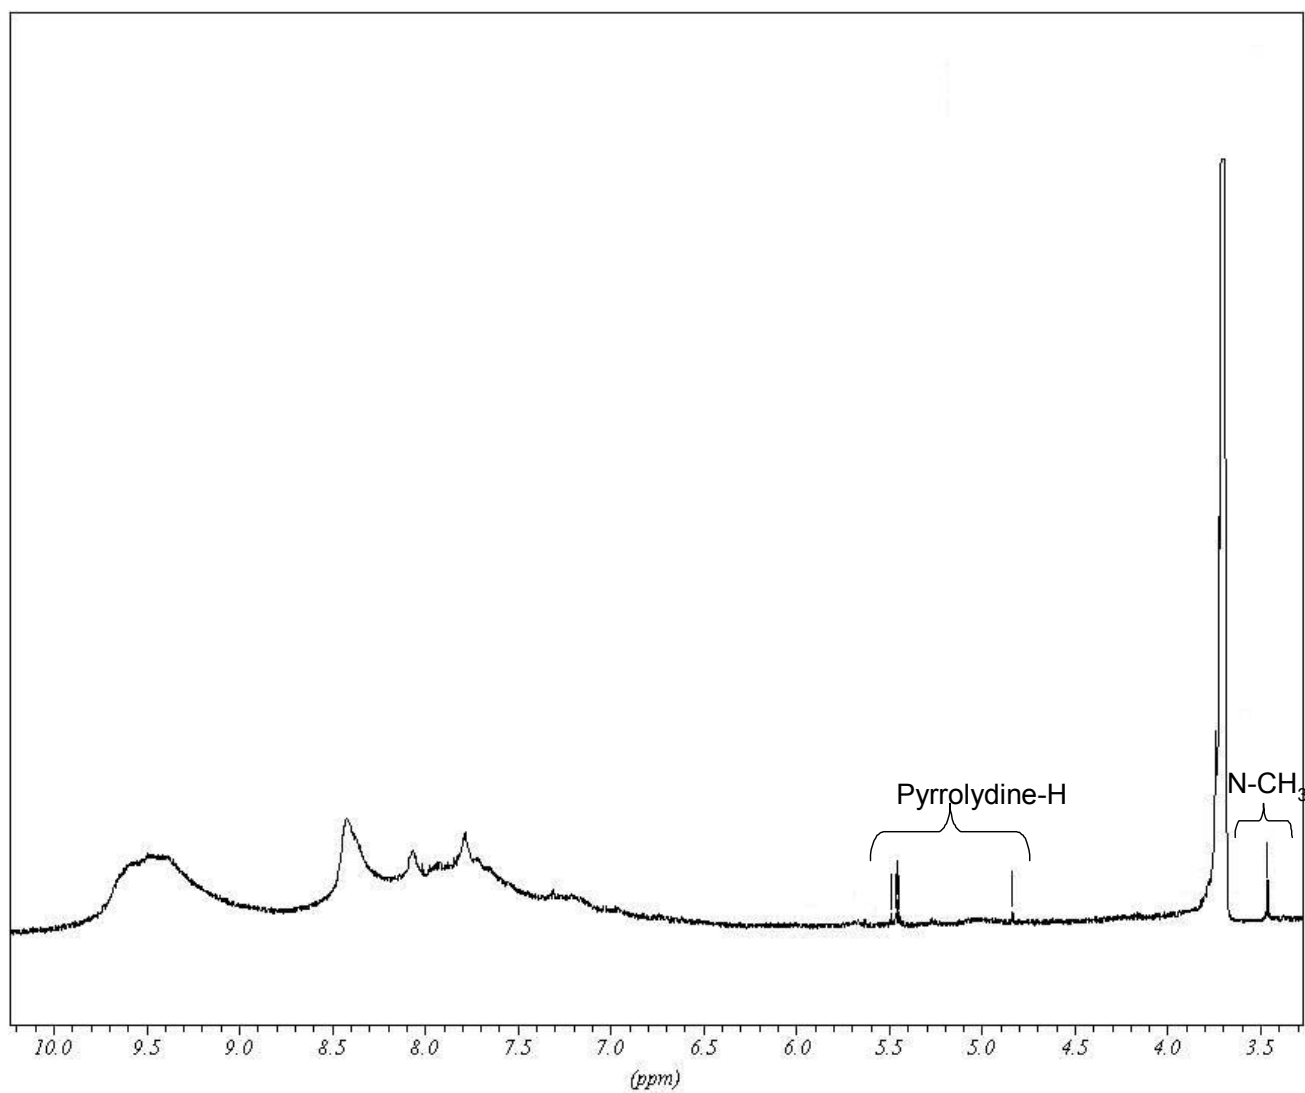

**Figure S9.** IR spectrum for **1**

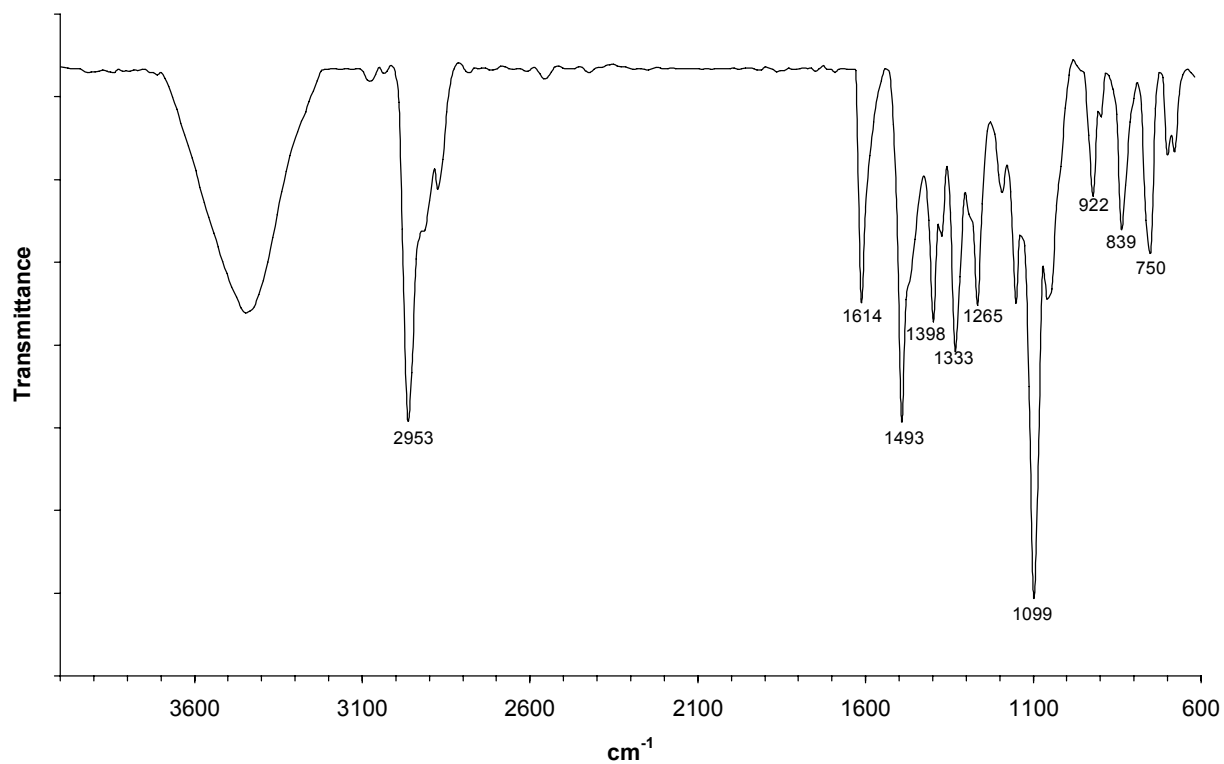

**Figure S10.** MS and HR-MS spectra for **1**

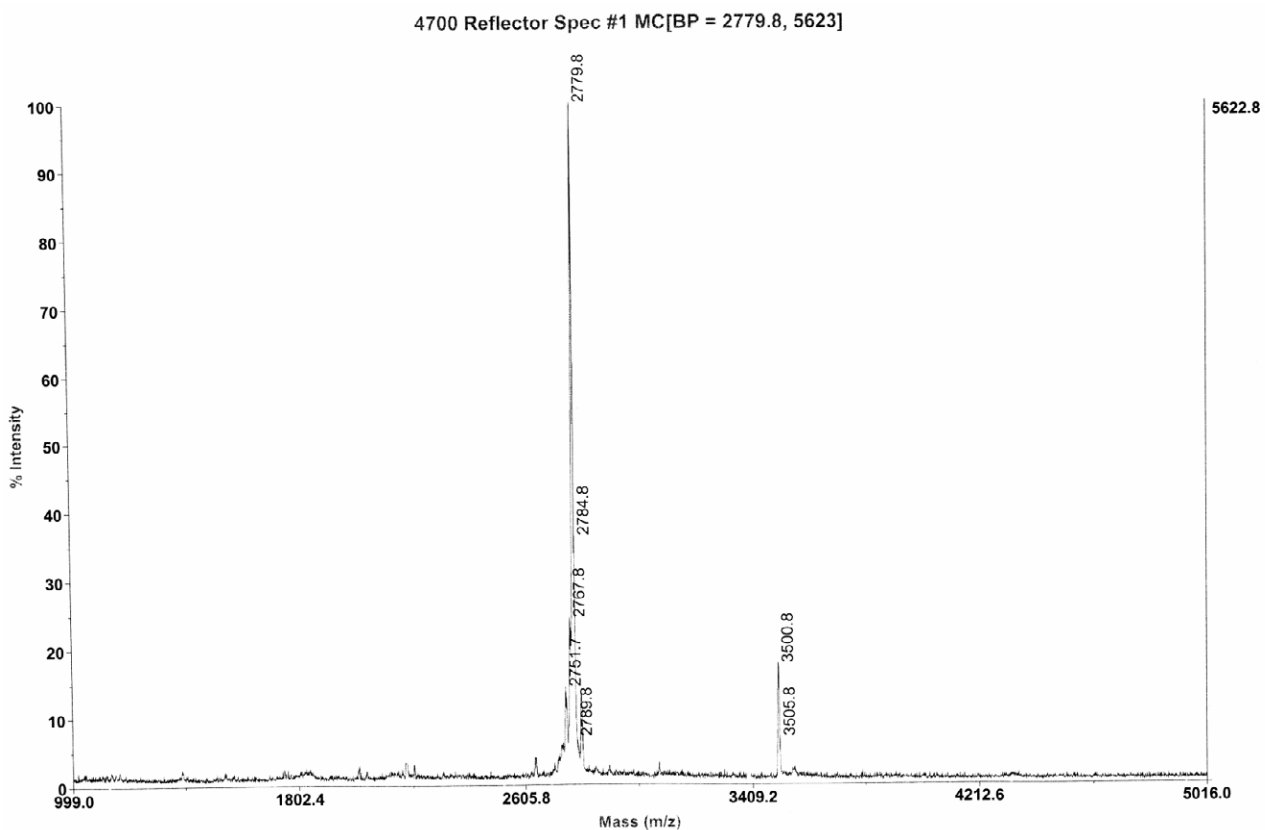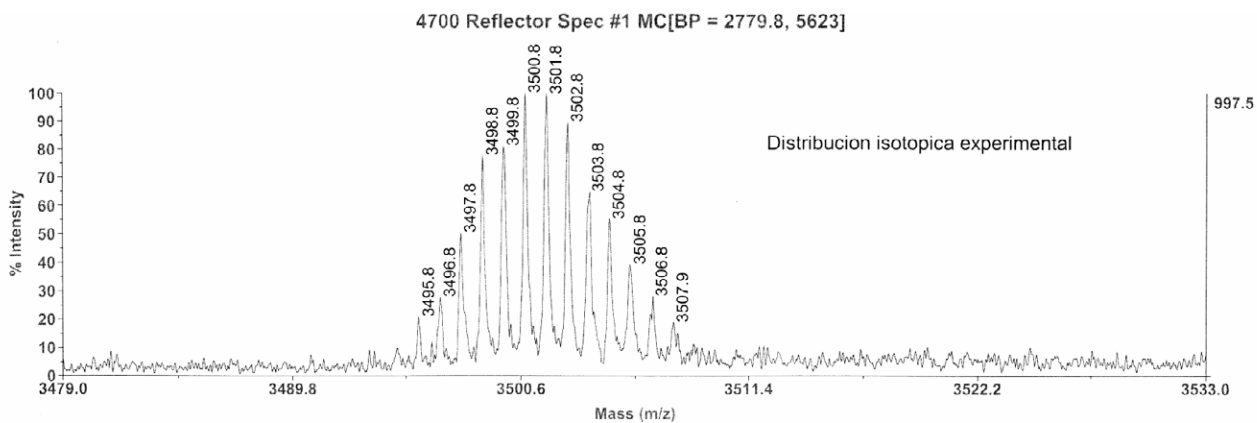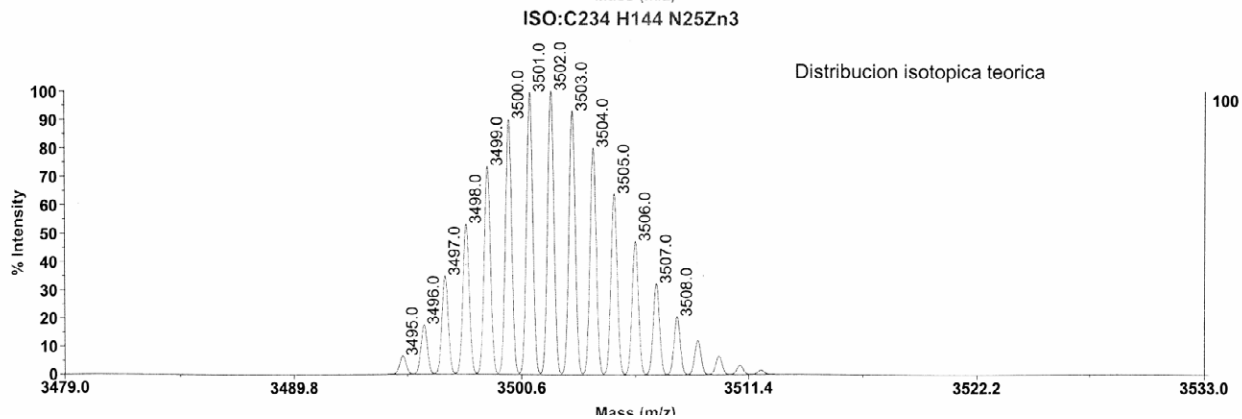

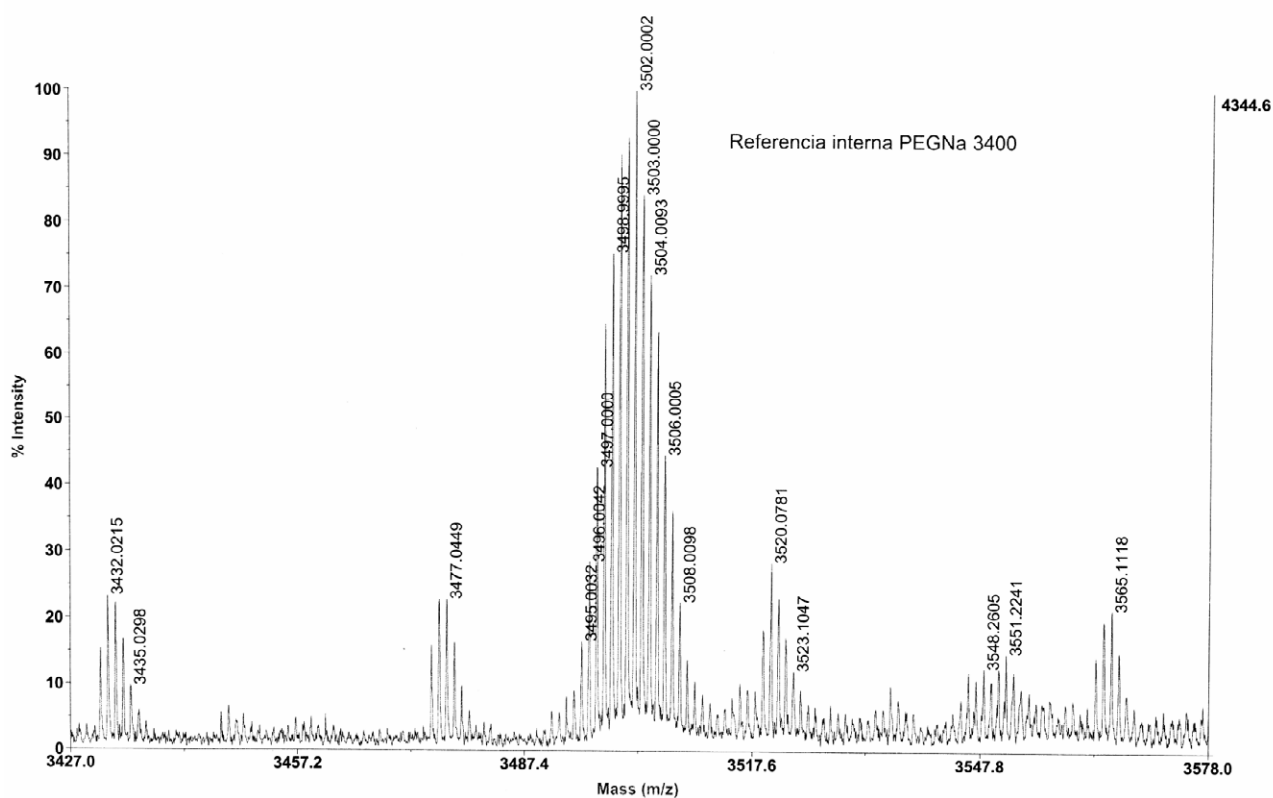

**Figure S 11.** Fluorescence time profile of **2** in THF following 611 nm photoexcitation, observing the emission at 700 nm.

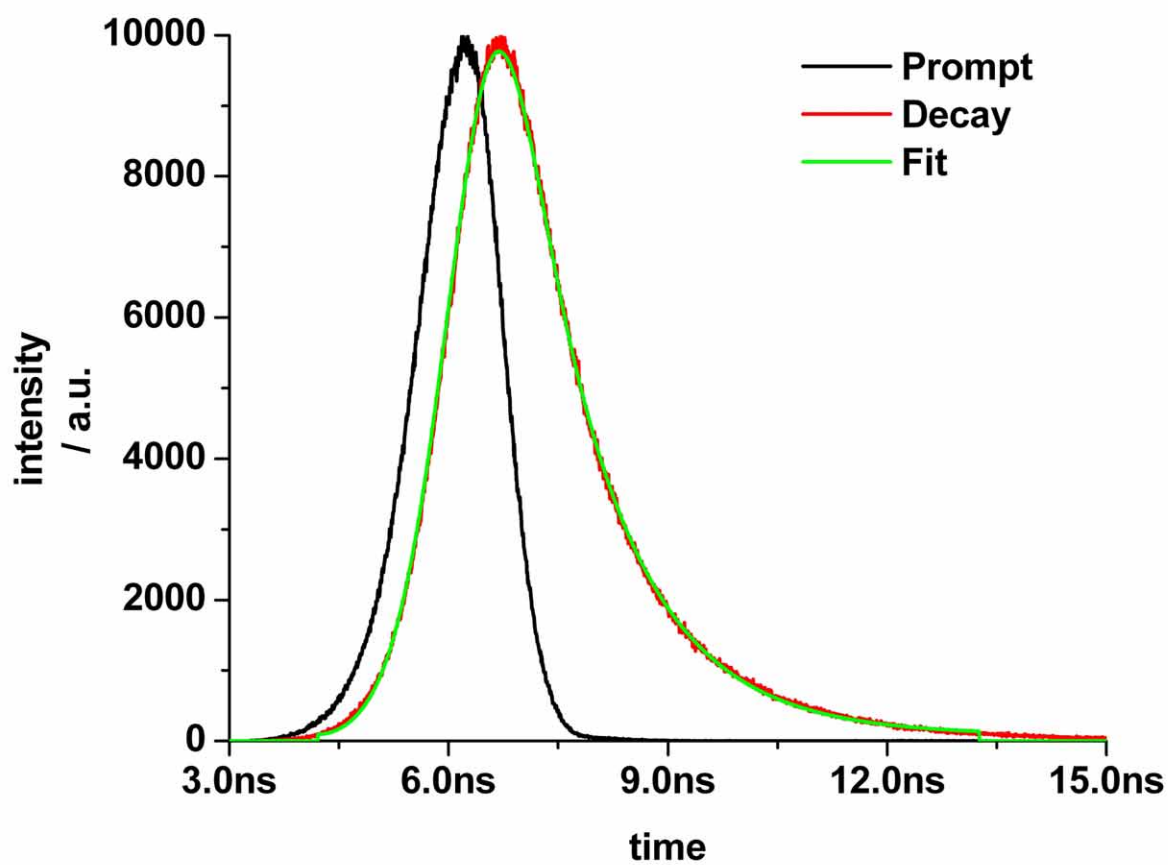

**Figure S 12.** Differential absorption spectra (visible and near-infrared) obtained upon femtosecond flash photolysis (670 nm) of **1** in argon saturated THF with several time delays (i.e., 1 ps – black spectrum; 102 ps – red spectrum; 2892 ps – green spectrum) at room temperature.

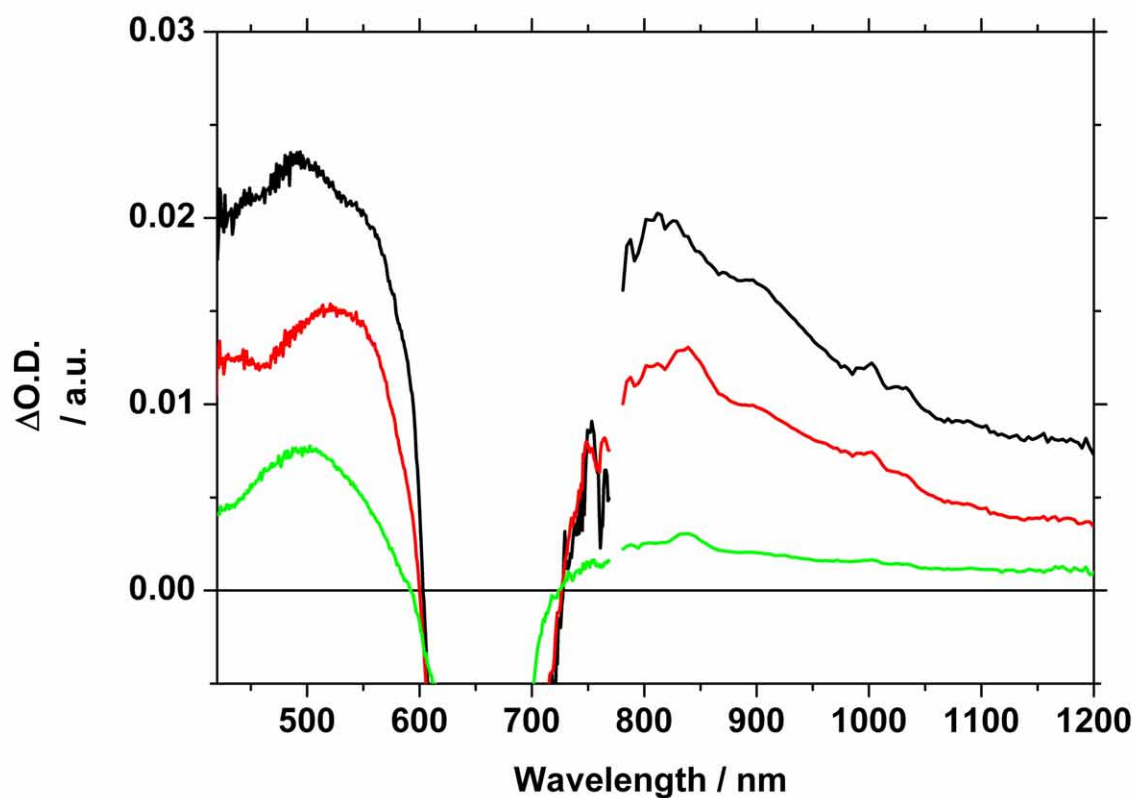

**Figure S 13.** Singlet oxygen phosphorescence spectra of oxygen saturated solutions of **1** and **2** in different solvents following 685 nm photoexcitation.

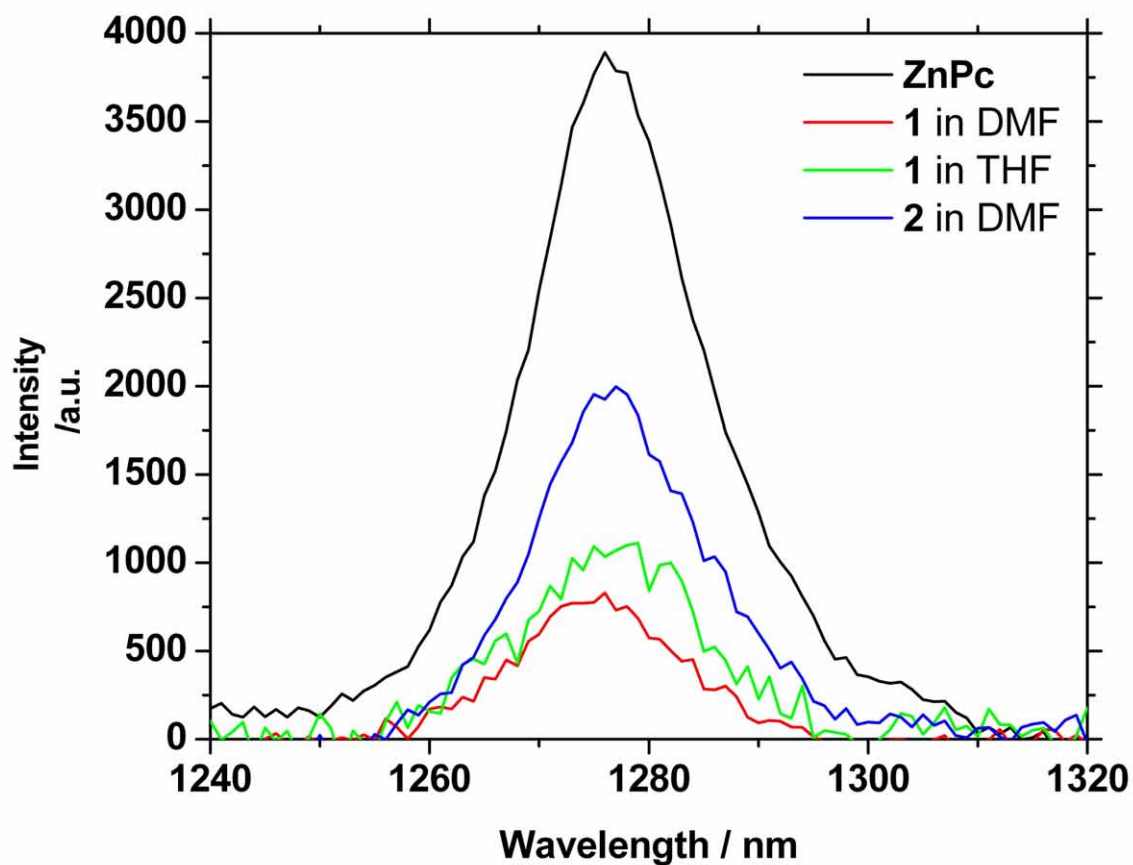

Supplement: b716322c.pdf [file b716322c.pdf]
